1 **Extension of the *in vivo* haploid induction system from maize to wheat.**

2 Chenxu Liu<sup>1,2#</sup>, Yu Zhong<sup>1#</sup>, Xiaolong Qi<sup>1#</sup>, Ming Chen<sup>1</sup>, Zongkai Liu<sup>1</sup>, Chen Chen<sup>1</sup>, Xiaolong,  
3 Tian<sup>1</sup>, Jinlong Li<sup>1</sup>, Yanyan Jiao<sup>1</sup>, Dong wang<sup>1</sup>, Yuwen Wang<sup>1</sup>, Mengran Li<sup>1</sup>, Mingming Xin<sup>1</sup>,  
4 Wenxin Liu<sup>1</sup>, Weiwei Jin<sup>1,2</sup>, Shaojiang Chen<sup>1,2\*</sup>

5 <sup>1</sup>College of Agronomy and Biotechnology, China Agricultural University, No. 2, Yuan Ming  
6 Yuan West Road, Haidian District, Beijing, 100193, China.

7 <sup>2</sup>National Maize Improvement Center of China, Beijing Key Laboratory of Crop Genetic  
8 Improvement, Laboratory of Crop Heterosis and Utilization, Joint International Research  
9 Laboratory of Crop Molecular Breeding, China Agricultural University, Beijing 100193, China.

10 # These authors contributed equally.

11 \* Corresponding author: Shaojiang Chen (chen368@126.com)

12

13 **Abstract**

14 Doubled haploid breeding technology has been one of the most important techniques for  
15 accelerating crop breeding. In compare to *in vivo* haploid induction in maize, which is efficient  
16 and background independent, wheat haploid production by interspecific hybridization pollinated  
17 with maize is influenced by genetic background and requires rescue of young embryos. Here, we  
18 analyzed the homologues of maize haploid induction gene *MTL/ZmPLA1/NLD* in several crop  
19 species systematically, the homologues are highly conserved in sorghum, millet and wheat etc.  
20 Since wheat is a very important polyploidy crop, as a proof of concept, we demonstrated that the  
21 *in vivo* haploid induction method could be extended from diploid maize to hexaploid wheat by  
22 knocking out the wheat homologues (*TaPLAs*). Result showed that double knock-out mutation  
23 could trigger wheat haploid induction at ~ 2%-3%, accompanied by 30% - 60% seed setting rate.  
24 The performance of haploid wheat individual showed shorter plant, narrower leaves and male  
25 sterile. Our results also revealed that knockout of *TaPLA-A* and *TaPLA-D* do not affect pollen  
26 viability. This study not only confirmed the function of the induction gene and explored a new  
27 approach for haploid production in wheat, but also provided an example that the *in vivo* haploid  
28 induction could be applied in more crop species with different ploidy levels. Furthermore, by  
29 combining with gene editing, it would be a fast and powerful platform for traits improvement in  
30 polyploidy crops breeding.

31 Key words: Wheat, Doubled Haploid (DH), Inducer, Breeding, CRISPR/Cas9

32

### 33 **Introduction**

34 Doubled haploid (DH) technology substantially accelerates the breeding process for several crop  
35 species. Several different methods have been established for producing haploids in different crop  
36 species (Ishii et al., 2016), including interspecific hybridization between maize and wheat to  
37 produce wheat haploids (Laurie, 1988); *in vivo* haploid induction to produce maize haploids (E.  
38 H. Coe, 1959), and anther/male gametophyte culture method to produce haploids in rice and  
39 other crop species (Germanà, 2011). Of these, only *in vivo* haploid induction in maize has been  
40 demonstrated to be independent of genetic background and to produce haploids efficiently (>  
41 10%), which make it possible to produce DH lines in an engineered way and laying a solid  
42 foundation for modern commercial breeding (Chen, 2013; Geiger, 2009). Recent studies of the  
43 genetics underlying *in vivo* haploid induction in maize revealed that several quantitative trait loci  
44 (QTL) contributed to haploid induction rate (HIR) (Prigge et al., 2012). Of these, *qhir1* is critical  
45 for haploid induction (Dong et al., 2013; Liu et al., 2015). Loss of function of the gene  
46 *MTL/ZmPLA1/NLD* in *qhir1* triggers haploid induction (Gilles et al., 2017; Kelliher et al., 2017;  
47 Liu et al., 2017a). Importantly, *in vivo* haploid induction system had been successfully applied to  
48 rice (Yao et al., 2018), making this method more important in plant breeding. Genetic analysis  
49 on the QTLs contributing HIR revealed that *qhir8* can improve haploid induction efficiency by  
50 3- to 5- fold (Liu et al., 2015), this is a promising result for improving DH breeding efficiency in  
51 crop species other than maize. In addition to producing homozygous DH lines, *in vivo* haploid  
52 induction in maize has also been used for gene editing without introducing the genome of the  
53 male parent, which is meaningful for genome editing in different genetic backgrounds (Kelliher  
54 et al., 2019; Wang et al., 2019).

55 Compared with *in vivo* haploid induction in maize, wheat haploid production through  
56 interspecific hybridization requires the rescue of young embryos and is depend on genetic  
57 background (Niu et al., 2014), which limits its application. *In vivo* haploid induction system has  
58 been extended from maize to rice, while both are diploid crop, little is known whether it can be  
59 applied to polyploidy plants. Wheat is a very important hexaploidy crop, to extend maize *in vivo*  
60 haploid induction to wheat would create a novel protocol in speeding up wheat breeding and  
61 providing a potential method for gene editing in different genetic backgrounds (Kelliher et al.,

62 2019; Wang et al., 2019). Furthermore, it would also give an example for exploring the haploid  
63 production and editing system in other polyploidy crops.

## 64 **Results and Discussion**

65 The full length amino acid sequence encoded by *MTL/ZmPLA1/NLD* was used to do a BLAST  
66 search for homologues in different crop species ([www.gramene.com](http://www.gramene.com)), followed by amino acid  
67 alignment and phylogenetic analysis using MEGA (Knyaz et al., 2018). Results showed that the  
68 gene is highly conserved among 19 species of Liliopsida (**Supplemental Figure 1**). Sorghum  
69 and millet homologues had >80% amino acid sequence identity with maize, and wheat and rice  
70 homologues were divided into two different branches (**Supplemental Figure. 1**), both which  
71 sharing ~70%-80% amino acid sequence identity with maize. Wheat genome consists three  
72 homologues: TraesCS4A02G018100 (*TaPLA-A*), TraesCS4B02G286000 (*TaPLA-B*) and  
73 TraesCS4D02G284700 (*TaPLA-D*), located on chromosomes 4A, 4B and 4D, respectively. All  
74 three shared a similar gene structure that includes four exons (**Figure1. A**). The amino acid  
75 sequence identity between each of the three homologues and *MTL/ZmPLA1/NLD* is 75%,  
76 representing a high level of conservation property. The amino acid sequences identity among the  
77 three *TaPLA* genes is 96%.

78 Next, we designed a guide RNA sequence (**Supplemental Table 1**) targeting the first exon of all  
79 three genes to create complete knockout lines using double-target CRISPR/Cas9 system  
80 (**Figure1. A**) (Xing et al., 2014). After *Agrobacterium tumefaciens*-mediated transformation,  
81 four transgenic events were obtained with mutations in both *TaPLA-A* and *TaPLA-D*. None of  
82 them had a mutation in *TaPLA-B* in subgenome B. Of the four transgenic events obtained, two  
83 transgenic lines, Da14-1 and ND52-6, were found to carry the same mutations: a 1bp guanine (G)  
84 deletion in *TaPLA-A* and a GG deletion in *TaPLA-D*. Da14-2 had the same 1-bp deletion in  
85 *TaPLA-A* as Da14-1 and ND52-6, but had a G to cytosine (C) mutation and a 1-bp G deletion in  
86 the gene *TaPLA-D* (**Figure1. A**). ND52-2 had a 5-bp GGGAC deletion in *TaPLA-A* and a GG  
87 deletion in *TaPLA-D*. Although different in sequence, all these mutations led to frame shifts and  
88 loss of function for both *TaPLA-A* and *TaPLA-D* (**Figure1. A**). These transgenic were chosen for  
89 subsequent analysis.

90 All T<sub>0</sub> transgenic and control plants were grown in the same greenhouse. No substantive  
91 phenotypic difference was found between wildtype and transgenic plants (**Supplemental Table**  
92 **1**), except for the seed setting rate (SSR), which ranged from ~30% to ~60% in transgenic lines,  
93 significantly lower than the average value of 92.6% in wildtype (**Figure1. B**), implying that  
94 *TaPLAs* may be involved in sexual reproduction. Haploid induction in transgenic lines was  
95 evaluated in the self-pollination progenies of T<sub>0</sub> generation. Putative haploid wheat plants were  
96 identified according to the haploid plant characteristic reported for maize and wheat (Liu et al.,  
97 2017a; Zhang et al., 2014). Putative haploid plants were found in self-pollinated progenies of all  
98 four transgenic lines (**Table 1**). In Da14-1 and Da14-2, two putative haploids were found among  
99 their T<sub>1</sub> populations of 70 and 82 plants, respectively. In ND52-2, three putative haploids  
100 occurred in a T<sub>1</sub> population of 83 plants. In ND52-6, four putative haloids were identified among  
101 102 plants (**Figure1. C, Table 1**). Flow cytometry was used to determine the real ploidy of each  
102 putative haploid. Compared with hexaploid controls which had an FL2A peak approximately 100,  
103 all putative haploids had an FL2A approximately 50 (**Figure1. D**), suggesting that putative  
104 haploids identified by phenotypic characteristic were true haploids. Compared with the hexaploid  
105 wheat plants, these haploids had shorter plant height, narrower leaves, shorter ears and male  
106 sterility (**Figure1. C, E**). No haploid plant was identified in a control group with 267 wildtype  
107 individuals. Therefore, we conclude that knockout of wheat homologues of *MTL/ZmPLA1/NLD*  
108 could trigger wheat haploids induction.

109 To characterize the expression pattern of the *TaPLA* genes, subcellular localization was  
110 performed in tobacco epidermal cells infected by agrobacterium. As shown in **Supplemental**  
111 **Figure. 2**, all three genes showed strong signals in the cytomembrane, that merged well with the  
112 endoplasmic reticulum (ER) marker. This result is consistent with the cytomembrane subcellular  
113 localization of *MTL/ZmPLA1/NLD* in maize (Gilles et al., 2017). Reciprocal crosses between the  
114 maize haploid inducer and non-inducer lines previously revealed that the transmission of male  
115 gametes from inducer lines is decreased significantly (Dong et al., 2013; Liu et al., 2017a),  
116 suggesting that haploid inducer lines lead to either low pollen viability of pollen or a defect in  
117 fusion between male and female gametes in double fertilization. Therefore, we performed  
118 fluorescein diacetate (FDA) staining to examine pollen viability in wildtype and mutants. Pollen  
119 from wildtype and mutant lines was divided into three classes: high-viability pollen, low-  
120 viability pollen and dead pollen according to their pollen viability (**Figure2. A**). There was no

121 difference in the proportion of pollen viability classes between mutants and wildtype (**Figure2.**  
122 **B**). This result demonstrates that loss of function of both *TaPLA-A* and *TaPLA-D* does not  
123 influence pollen viability.

124 In summary, as a proof of concept, we have demonstrated that *in vivo* haploid induction can be  
125 extended from diploid maize to wheat, by knocking out *TaPLA-A* and *TaPLA-D*. Previous  
126 studies on *in vivo* haploid induction in crop species, used maize or rice, which are diploid. This  
127 study provided the first proof that *in vivo* haploid induction is not limited to diploid crop species  
128 but can be extended to polyploidy species, which substantially extended its potential.  
129 Considering the potential redundancy among *TaPLA-A*, *TaPLA-B* and *TaPLA-D*, existence of  
130 *TaPLA-B* may have functional complementation effect in *Tapla-A* and *Tapla-B* double mutant.  
131 Nevertheless, the complementation effect is not sufficient to rescue the phenotype of haploid  
132 induction and decreased SSR. On the other hand, further improvement in the efficiency of  
133 haploid induction in wheat may be achieved by creating triple mutants.

134 The observed phenotype of *TaPLAs* knockout lines including a ~2-3% haploid frequency and  
135 significantly decreased SSR, are similar to that of maize and rice (Gilles et al., 2017; Kelliher et  
136 al., 2017; Liu et al., 2017a; Yao et al., 2018), suggesting that *MTL/ZmPLA1/NLD* homologues  
137 are involved in the similar pathway during double-fertilization across different crop species.  
138 Thus, our study provided an alternative crop species in exploring the biological mechanism of  
139 haploid induction.

140 Several technical problems require further investigation before *in vivo* haploid induction can be  
141 applied efficiently in wheat, including low efficiency in haploid induction and the difficulties in  
142 wheat haploid identification in seed stage. Nonetheless, our study provides an alternative  
143 approach other than interspecific hybridization for generating haploids in wheat. Through in-  
144 depth study of the genetic basis and biological mechanisms of *in vivo* haploid induction in maize,  
145 more and more genes contributing HIR will be identified (Liu et al., 2015; Prigge et al., 2012).  
146 The efficiency of wheat haploid induction may be further improved by the knockout/over-  
147 expression of these new identified homologous genes contributing HIR in maize. On the other  
148 hand, recent studies enable the identification of haploids using enhanced green fluorescent  
149 proteins (EGFP) and DsRED signals specifically expressed in the embryo and endosperm,

150 respectively (Dong et al., 2018). This method may provide a potential solution for haploid kernel  
151 identification in wheat, which lacks phenotypic markers like *R1-nj* and high oil content existed in  
152 maize (Dong et al., 2014).

153 Recent studies that utilized the combination of CRISPR/Cas9-mediated gene editing and haploid  
154 induction revealed that *in vivo* haploid induction can enable gene editing in maternal haploids in  
155 any background, without mixing the paternal genome (commonly referred to as “HI-edit” or  
156 “IMGE”) (Kelliher et al., 2019; Wang et al., 2019). This is promising for future genetic  
157 improvement of crops. However, the “HI-edit using CRISPR/Cas9 and interspecific  
158 hybridization has a lower editing efficiency in wheat than that in maize (Kelliher et al., 2019;  
159 Wang et al., 2019). Because our study demonstrates the feasibility of *in vivo* haploid induction in  
160 wheat, it also provides a putative platform for wheat haploid gene editing with CRISPR/Cas9.  
161 Considering the conservation of gene sequence and the capacity for haploid induction among  
162 maize, rice and wheat, this method could potentially be extended to a wider variety of crop  
163 species.

## 164 **Methods**

### 165 **Knockout of homologous genes in wheat**

166 The full-length amino acid sequence of *ZmPLA1/MTL/NLD* was used to perform a BLAST  
167 search for the homologous genes in crop species. Amino acid sequences of homologues were  
168 downloaded ([www.gramene.com](http://www.gramene.com)) and used for cluster alignment followed by a phylogenic  
169 analysis with the neighbor-joining method using the software MEGA X with default parameter  
170 (Knyaz et al., 2018). A guide RNA sequence was then designed targeting the homologous gene  
171 and then cloned into vector pBUEB411 (Liu et al., 2017b; Xing et al., 2014). The hexaploid  
172 wheat line CB037 was used for transformation (Wang et al., 2017). Young embryos were  
173 sampled and used for *A. tumefaciens*-mediated transformation. Positive calluses were screened  
174 using bialaphos. Transgenic T<sub>0</sub> plants were transplanted in the green house and verified by  
175 sequencing of the target site. Plants with insertion/deletion mutations that lead to frame shifts  
176 and complete loss of function were chosen to produce the T<sub>1</sub> generation. Genotyping was  
177 confirmed by sequencing in the T<sub>1</sub> plants by sequencing were performed again.

## 178 **Haploid plant identification and verification**

179 Putative haploids were screened in the T<sub>1</sub> generation. In maize, haploids have shorter plant  
180 height, narrower leaves, smaller anther and are sterile. Thus, wheat plants with the above-  
181 mentioned phenotypes were selected as putative haploids. Subsequently, ploidy of putative  
182 haploids was verified using flow cytometry (Liu et al., 2017a). Young leaves of both hexaploids  
183 (controls) and putative haploids were sampled and chopped with a razor blade in buffer (Schutte  
184 et al., 1985). Nuclei were extracted and stained with a fluorescent dye. The signal peak of  
185 standard hexaploids (controls) was set to 100, these putative haploids with signal peak at 50 were  
186 considered real haploids. HIR was calculated as follows:  $\text{HIR (\%)} = (\text{number of haploid}$   
187  $\text{plants}/\text{total number of plants derived from same individual}) \times 100\%$ . For each ear, the SSR was  
188 calculated as follows:  $\text{SSR (\%)} = (\text{number of viable seeds}/\text{total number of embryo sacs on the ear})$   
189  $\times 100\%$ .

## 190 **Pollen viability analysis**

191 A fresh FDA staining buffer was made by mixing 100  $\mu\text{l}$  FDA stock solution (0.5% in acetone)  
192 with 4.9 ml sucrose solution (Widholm, 1972). Fresh pollen (20 mg) was sampled from wildtype  
193 and mutant lines in the greenhouse and mixed immediately with the FDA working solution and  
194 left in dark environment for 1 h without covering to guarantee an abundant supply of oxygen for  
195 the esterase reaction. Three biological replicates were performed. Fluorescent was observed and  
196 photographed by a fluorescence microscope (Nikon, Ci-S-FL) with an excitation wavelength of  
197 485 nm. Pollens that exhibited strong green fluorescence from the cytosol was considered to be  
198 highly viable pollen, pollen that exhibited weak fluorescence was considered as low viability  
199 pollen, and pollen with no detectable staining was considered dead.

## 200 **Subcellular co-localization**

201 RNA from mature pollen of wildtype CB037 was extracted using TRIzol reagent. Reverse  
202 transcription was performed using oligo (dT) primers to obtain full-length cDNA. The coding  
203 sequence of *TaPLA-A*, *TaPLA-B* and *TaPLA-D* without termination codons (TGA) were cloned  
204 into a vector 1305-EGFP driven by the 35S promotor. Sequencing-validated constructs of  
205  $35\text{S}::\textit{TaPLA-A-EGFP}$ ,  $35\text{S}::\textit{TaPLA-B-EGFP}$  and  $35\text{S}::\textit{TaPLA-D-EGFP}$  and ER marker were



206 used for *A. tumefaciens*–mediated transformation into tobacco epidermal cells. After culturing at  
207 21 °C for 48 hours, EGFP signals were observed and imaged using a confocal laser-scanning  
208 microscope (Zeiss LSM 710). As a control, empty 1305-EGFP vector was also transformed.

## 209 **Author contributions**

210 S.C. and C.L. conceive and designed the project. C.L., Y.Z. constructed plasmid. X.Q., Y.Z.,  
211 M.C., Z.L., C.C., X.T., J.L., D.W., Y.W., M.L. and W.L. planted transgenic plants in greenhouse  
212 and performed haploid identification and verification, phenotype investigations. Y.Z., C.L., X.Q.,  
213 M.L., and W.L. performed data analysis. C.L., Y.Z., X.Q. M. X .and S.C. wrote the paper.

## 214 **Acknowledgments**

215 We thank Prof. Xingguo Ye of Institute of crop science, Chinese academy of agricultural  
216 sciences, for his help in wheat transformation. We thank Prof. Pu Wang of College of Agronomy  
217 and Biotechnology, China Agricultural University, for providing greenhouse. We thank Dr.  
218 Qiguo Yu of Rutgers, The State University of New Jersey, for reading the manuscript. We thank  
219 Prof. Jingrui Dai, Prof. Qixin Sun and Prof. Zhongfu Ni for their valuable suggestions. This  
220 research was supported by the National Key Research and Development Program of China  
221 (2016YFD0101200) the Modern Maize Industry Technology System (CARS–02–04) and China  
222 Postdoctoral Science Foundation (2018M631634).

223

## 224 **REFERENCES**

- 225 Chen, S. (2013). Crop Breeding Engineering and Engineered Breeding. *Crops* 6:1-4.  
226 Dong, L., Li, L., Liu, C., Liu, C., Geng, S., Li, X., Huang, C., Mao, L., Chen, S., and Xie, C. (2018). Genome  
227 Editing and Double-Fluorescence Proteins Enable Robust Maternal Haploid Induction and  
228 Identification in Maize. *Molecular plant* 11:1214-1217.  
229 Dong, X., Xu, X., Li, L., Liu, C., Tian, X., Li, W., and Chen, S. (2014). Marker-assisted selection and  
230 evaluation of high oil in vivo haploid inducers in maize. *Molecular Breeding* 34:1147-1158.  
231 Dong, X., Xu, X., Miao, J., Li, L., Zhang, D., Mi, X., Liu, C., Tian, X., Melchinger, A.E., and Chen, S. (2013).  
232 Fine mapping of qhir1 influencing in vivo haploid induction in maize. *TAG. Theoretical and*  
233 *applied genetics. Theoretische und angewandte Genetik.*  
234 E. H. Coe, J. (1959). A Line of Maize with High Haploid Frequency. *93:381-382.*  
235 Geiger, H.H., Gordillo, G. A. (2009). Doubled haploids in hybrid maize breeding. *Maydica* 54:485-499.  
236 Germanà, M.A. (2011). Anther culture for haploid and doubled haploid production. *104:283-300.*

- 237 Gilles, L.M., Khaled, A., Laffaire, J.B., Chaignon, S., Gendrot, G., Laplaige, J., Bergès, H., Beydon, G., Bayle,  
238 V., Barret, P., et al. (2017). Loss of pollen-specific phospholipase NOT LIKE DAD triggers  
239 gynogenesis in maize. *The EMBO journal*:e201796603.
- 240 Ishii, T., Karimi-Ashtiyani, R., and Houben, A. (2016). Haploidization via Chromosome Elimination: Means  
241 and Mechanisms. *Annual review of plant biology* 67:421-438.
- 242 Kelliher, T., Starr, D., Richbourg, L., Chintamanani, S., Delzer, B., Nuccio, M.L., Green, J., Chen, Z.,  
243 McCuiston, J., Wang, W., et al. (2017). MATRILINEAL, a sperm-specific phospholipase, triggers  
244 maize haploid induction. *Nature* 542:105-109.
- 245 Kelliher, T., Starr, D., Su, X., Tang, G., Chen, Z., Carter, J., Wittich, P.E., Dong, S., Green, J., Burch, E., et al.  
246 (2019). One-step genome editing of elite crop germplasm during haploid induction. *Nature*  
247 *biotechnology* 37:287-292.
- 248 Knyaz, C., Stecher, G., Li, M., Kumar, S., and Tamura, K. (2018). MEGA X: Molecular Evolutionary Genetics  
249 Analysis across Computing Platforms. *Molecular Biology and Evolution* 35:1547-1549.
- 250 Laurie, D.A., Bennett, M.D. (1988). The production of haploid wheat plants from wheat x maize crosses.  
251 *Theoretical and Applied Genetics* 76:393-397.
- 252 Liu, C., Li, W., Zhong, Y., Dong, X., Hu, H., Tian, X., Wang, L., Chen, B., Chen, C., Melchinger, A.E., et al.  
253 (2015). Fine mapping of qhir8 affecting in vivo haploid induction in maize. *TAG. Theoretical and*  
254 *applied genetics. Theoretische und angewandte Genetik* 128:2507-2515.
- 255 Liu, C., Li, X., Meng, D., Zhong, Y., Chen, C., Dong, X., Xu, X., Chen, B., Li, W., Li, L., et al. (2017a). A 4bp  
256 insertion at ZmPLA1 encoding a putative phospholipase A generates haploid induction in maize.  
257 *Molecular plant*.
- 258 Liu, H., Ding, Y., Zhou, Y., Jin, W., Xie, K., and Chen, L.L. (2017b). CRISPR-P 2.0: An Improved CRISPR-Cas9  
259 Tool for Genome Editing in Plants. *Molecular plant* 10:530-532.
- 260 Niu, Z., Jiang, A., Abu Hammad, W., Oladzadabbasabadi, A., Xu, S.S., Mergoum, M., and Elias, E.M. (2014).  
261 Review of doubled haploid production in durum and common wheat through wheat x maize  
262 hybridization. *133:313-320*.
- 263 Prigge, V., Xu, X., Li, L., Babu, R., Chen, S., Atlin, G.N., and Melchinger, A.E. (2012). New insights into the  
264 genetics of in vivo induction of maternal haploids, the backbone of doubled haploid technology  
265 in maize. *Genetics* 190:781-793.
- 266 Wang, B., Zhu, L., Zhao, B., Zhao, Y., Xie, Y., Zheng, Z., Li, Y., Sun, J., and Wang, H. (2019). Development of  
267 a Haploid-Inducer Mediated Genome Editing (IMGE) System for Accelerating Maize Breeding.  
268 *Molecular plant*.
- 269 Wang, K., Liu, H., Du, L., and Ye, X. (2017). Generation of marker-free transgenic hexaploid wheat via an  
270 *Agrobacterium*-mediated co-transformation strategy in commercial Chinese wheat varieties.  
271 *15:614-623*.
- 272 Widholm, J.M. (1972). The Use of Fluorescein Diacetate and Phenosafranine for Determining Viability of  
273 Cultured Plant Cells. *Stain Technology* 47:189-194.
- 274 Xing, H.-L., Dong, L., Wang, Z.-P., Zhang, H.-Y., Han, C.-Y., Liu, B., Wang, X.-C., and Chen, Q.-J.J.B.P.B.  
275 (2014). A CRISPR/Cas9 toolkit for multiplex genome editing in plants. *14:327*.
- 276 Yao, L., Zhang, Y., Liu, C., Liu, Y., Wang, Y., Liang, D., Liu, J., Sahoo, G., and Kelliher, T. (2018). OsMATL  
277 mutation induces haploid seed formation in indica rice. *Nat Plants* 4:530-533.
- 278 Zhang, W., Wang, K., Lin, Z.-S., Du, L.-P., Ma, H.-L., Xiao, L.-L., and Ye, X.-G.J.B.S. (2014). Production and  
279 identification of haploid dwarf male sterile wheat plants induced by corn inducer. *55:26*.

280

281

282 **LEGENDS**

283 **Figure 1. Knockout of wheat homologues of *MTL/ZmPLA1/NLD* and phenotypic analysis.**

284 (A) Gene structure of wheat homologues *TaPLA-A*, *TaPLA-B* and *TaPLA-D*. Exons in red were  
285 target regions of guide RNAs. Shown below are knockout sequence results for of transgenic  
286 line Da14-1, Da14-2, ND52-2 and ND52-2 at *TaPLA-A* and *TaPLA-D*, respectively.  
287 Sequences in green are target sequences of *TaPLA-A* and *TaPLA-D*, the guide RNA is  
288 underlined. Black indicates the sequence of transgenic events. Deletions are shown by “-” on  
289 gray background.

290 (B) Ear performance of in wildtype (left) and knockout (right) plants. Statistical analysis for seed  
291 setting rate (SSR) of wildtype and four transgenic lines are shown on the right side. SSR was  
292 calculated as  $SSR (\%) = (\text{number of viable seeds}/\text{number of embryo sacs on an ear}) \times 100\%$ .  
293 \*\*  $P < 0.01$  calculated with the heteroscedastic two-tailed Student's *t*-test. Sample size of SSR  
294 for wildtype and each transgenic line was marked on the top of column.

295 (C) Phenotypic difference between haploid (H) and hexaploidy (HE) wheat, including whole  
296 plant, leaf, ear and anther. H, haploid; HE, Hexaploid. Bars = 5 cm, 1 cm, 1 cm and 1 mm for  
297 whole plant, flag leaf, ear and anther, respectively.

298 (D) Ploidy verification by flow cytometry for hexaploid and haploid plants.

299 (E) Statistical analysis of phenotypic differences including plant height, leaf length, leaf width  
300 and anther length between haploid and hexaploid wheat. Both stems (M) and tillers (T) of  
301 haploids and hexaploids were analyzed. A heteroscedastic two-tailed Student's *t*-test was  
302 performed for each class between wildtype and mutant. \*, \*\* and \*\*\*  $P < 0.05$ , 0.01 and 0.001,  
303 respectively.

304 **Figure 2. Pollen viability assays with FDA staining.**

305 (A) Comparison of pollen viability between wildtype and mutants in CB037 background (scale  
306 bar, 100 $\mu$ m). Pollen with a strong GFP (white triangle) and weak (yellow triangle) or no (red  
307 triangle) represented for high-viability pollen (HVP), low-viability pollen (LVP) and died  
308 pollen (DP), respectively.

309 (B) Ratio of the three viability classes in wildtype and mutant pollen. Statistics were conducted  
310 with three biological replicates. A heteroscedastic two-tailed Student's *t*-test was performed  
311 for each class between wildtype and mutant. NS, not significant ( $P \geq 0.05$ ).

312 **Table 1. Haploid induction potential of transgenic lines.**

313 Haploid plants occurred in self-pollination progeny of transgenic lines, genotype on *TaPLA-A*  
314 and genotype *TaPLA-D* showed, H, heterozygous; M, homozygous mutant; W, wildtype. The  
315 control group comprised self-pollinated plants from the wildtype receptor background CB037.

316 **Supplemental Figure 1. Phylogenetic analysis of *MTL/ZmPLA1/NLD* homologues among**  
317 **main crop species.**

318 The green background indicates phylogenetic branch containing maize, sorghum and millet; blue  
319 background indicates wheat relative species; orange background indicates rice relative species.  
320 The scale bar indicates the proportion of the sites changing along each branch.

321 **Supplemental Figure 2. Subcellular localization of *TaPLAs* in tobacco epidermal cells.**

322 Confocal scanning (GFP; outside left), ER-mCherry signal (inside left), differential interference  
323 contrast (DIC; inside right), and merged (outside right) micrographs of tobacco epidermal cells  
324 transformed with a 35S::*TaPLA-A*-EGFP (row 1), 35S::*TaPLA-B*-EGFP (row 2), 35S::*TaPLA-*  
325 *D*-EGFP (row 3) and 35S::EGFP control (row 4). Scale bars = 100  $\mu$ m.

326 **Supplemental Table 1. Phenotypic differences between wildtype and mutant plants.**

327 Both wildtype and double mutants are in CB037 background. PH, plant height; LW, leaf width  
328 of the flag leaf from stem; LL, leaf length of the flag leaf from stem; EL, stem ear length; NT,  
329 the number of tillers; NA, Not Applicable. Each phenotype was compared between wildtype and  
330 mutant using a heteroscedastic two-tailed Student's *t*-test.

331 **Supplemental Table 2. Primers used in this study.**

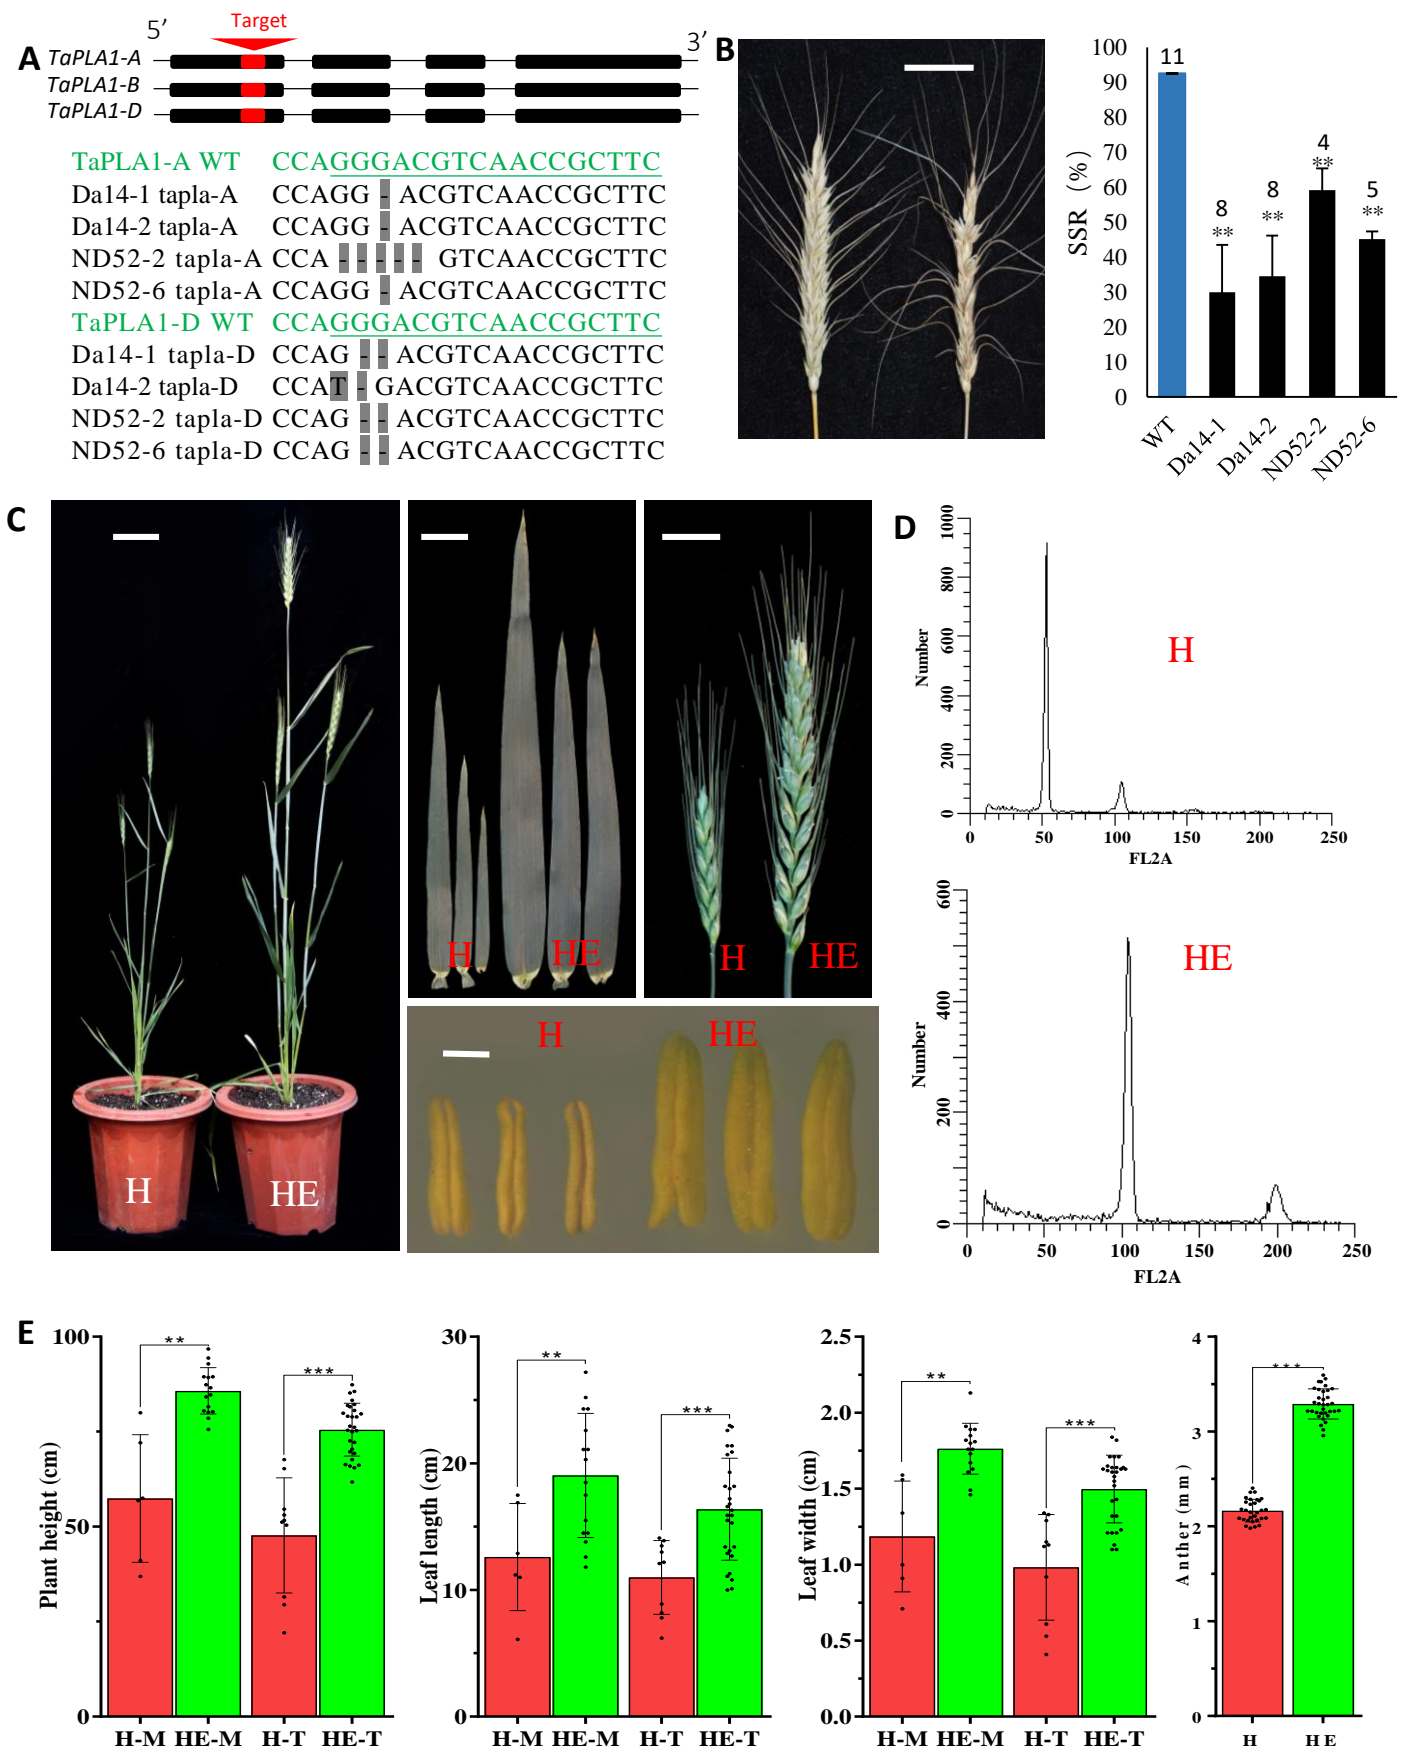

Figure. 1 knockout *TaPLA1s* leading to haploid induction in wheat.

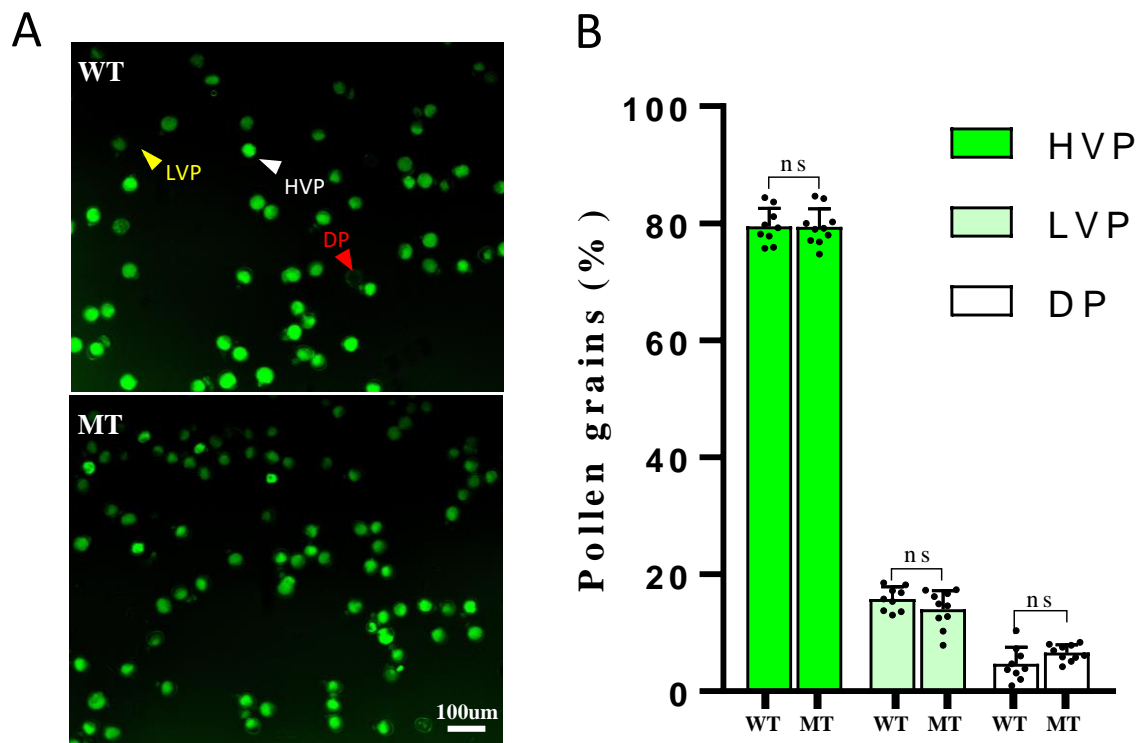

**Figure. 2**

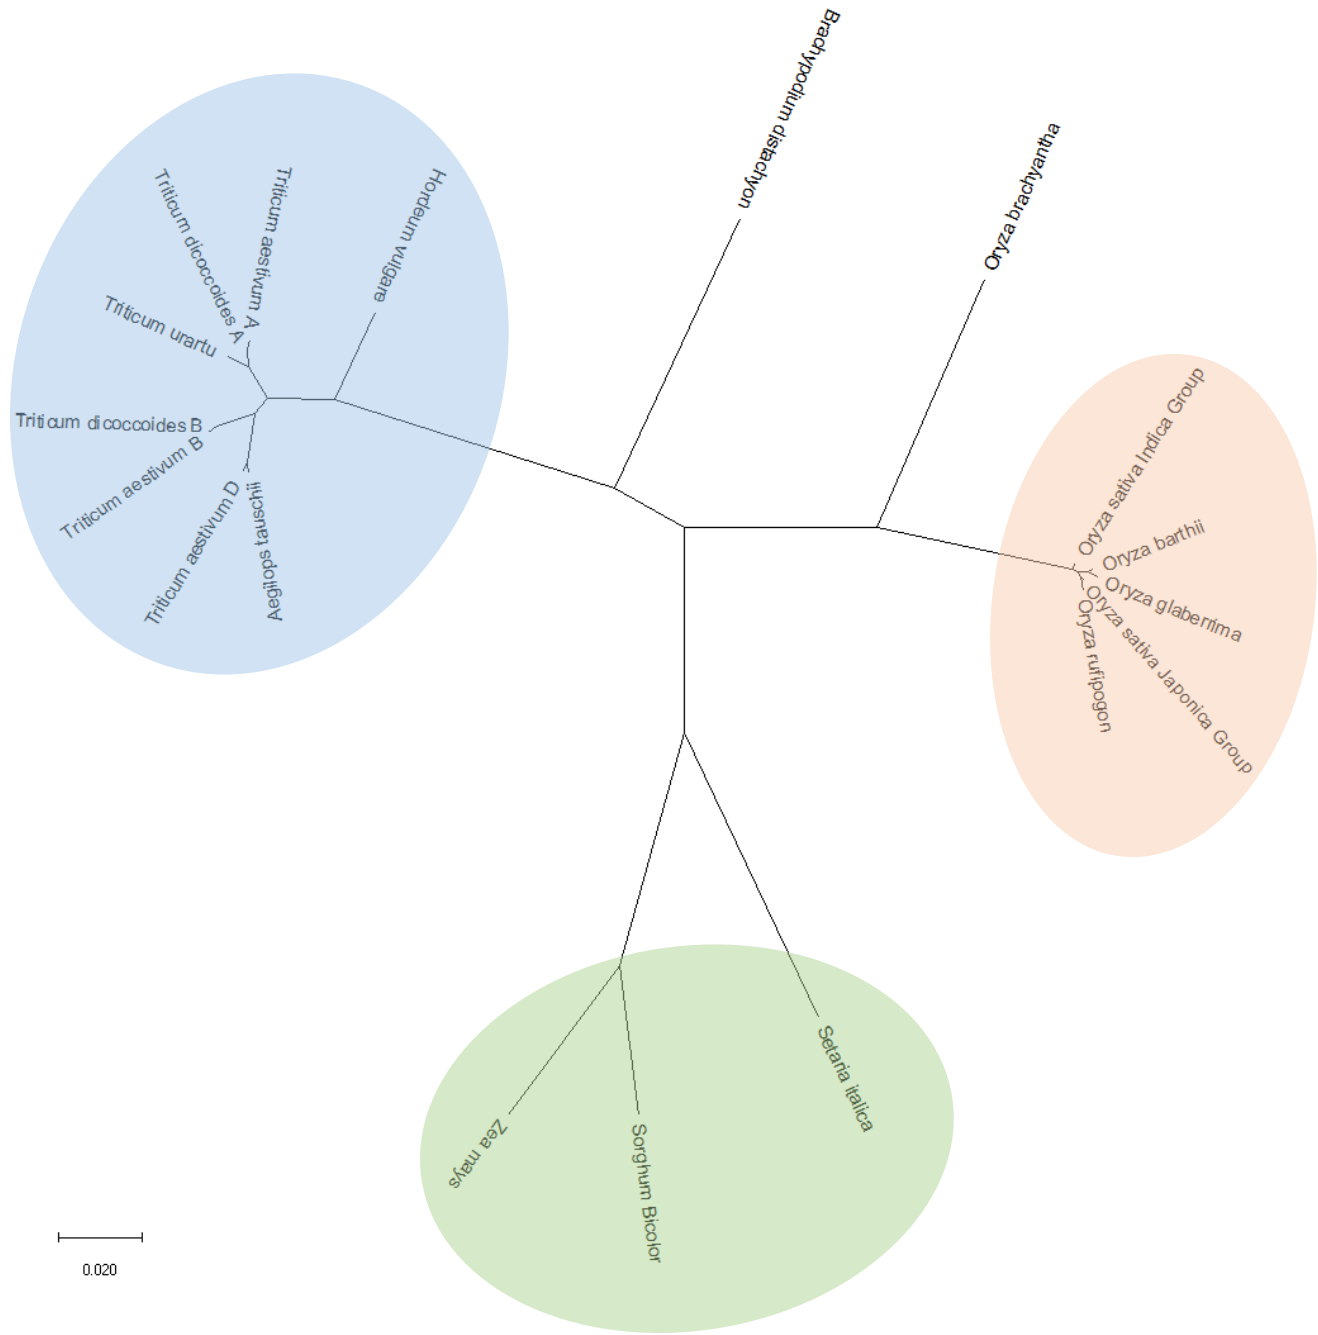

Supplemental Figure. 1

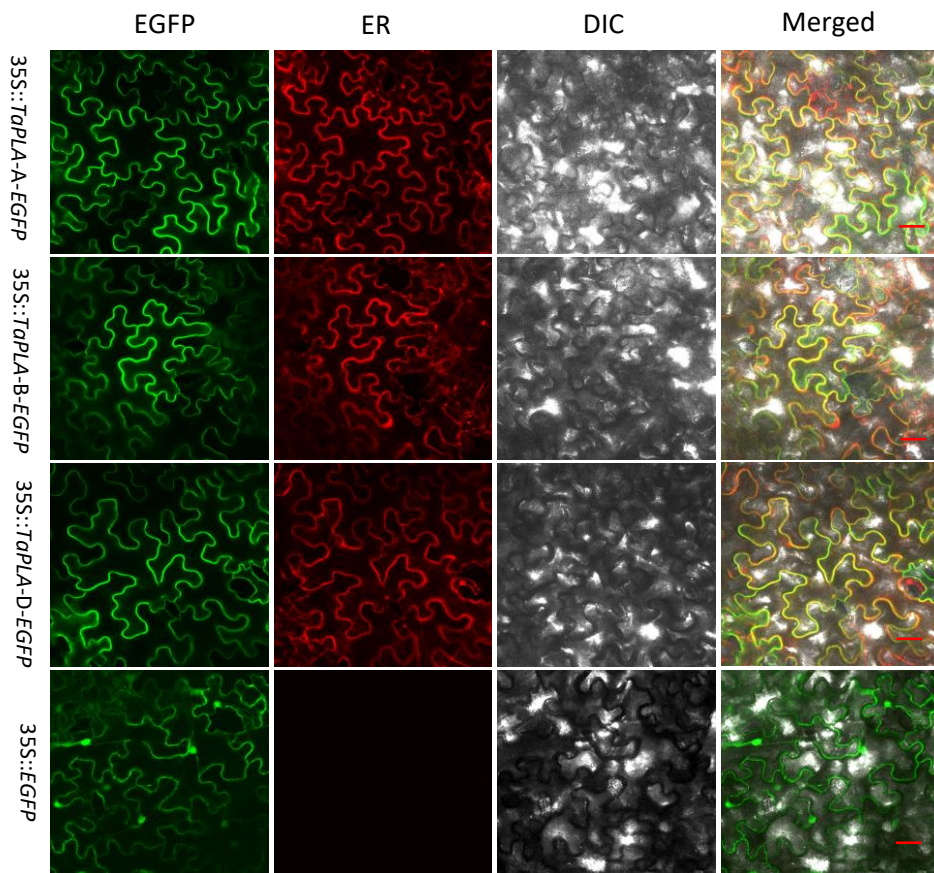

Supplemental Figure. 2



**Table. 1**

| Transgenic events&Control | Genotype <i>TaPLA-A</i> | Genotype <i>TaPLA-D</i> | Total plants | Haploid plants | HIR (%) |
|---------------------------|-------------------------|-------------------------|--------------|----------------|---------|
| Da14-1                    | M                       | H                       | 70           | 2              | 2.86    |
| Da14-2                    | H                       | H                       | 82           | 2              | 2.44    |
| ND52-2                    | H                       | H                       | 83           | 3              | 3.61    |
| ND52-6                    | H                       | H                       | 102          | 4              | 3.92    |
| Control                   | W                       | W                       | 267          | 0              | 0.00    |

Supplemental Table. 1 Phenotypic analysis between wildtype and knockout lines.

| Genotype | Statistics | PH    | PW    | PL    | EL    | NT    |
|----------|------------|-------|-------|-------|-------|-------|
| wildtype | 5          | 89.58 | 1.42  | 17.38 | 13.36 | 3.4   |
| Mutant   | 10         | 84.08 | 1.52  | 18.22 | 13.42 | 2.8   |
| T.test   | NA         | 0.080 | 0.510 | 0.613 | 0.847 | 0.599 |

Supplemental Table. 2 Primers used in the study

| Primer name    | Left sequence (5'-3')                | Functions                      |
|----------------|--------------------------------------|--------------------------------|
| 1305Ta4A+GFP-F | CGGAGCTAGCTCTAGAATGGCAAGCTACTGGTGCCG | Subcellular<br>localizaiton    |
| 1305Ta4A+GFP-R | TGCTCACCATGGATCCGCGTCTGGATTCAGACGGC  |                                |
| 1305Ta4B+GFP-F | CGGAGCTAGCTCTAGAATGATGGCAAGCTACTGGTG |                                |
| 1305Ta4B+GFP-R | TGCTCACCATGGATCCGCGGCTGGATTCAGGCGGC  |                                |
| 1305Ta4D+GFP-F | CGGAGCTAGCTCTAGAATGGCAAGCTACTGGGGCCG |                                |
| 1305Ta4D+GFP-R | TGCTCACCATGGATCCGCGGCTGGATTCAGGCGGC  |                                |
| 5`-A1          | GAGGTGTCGTACGTCGGTTT                 | Full length gene<br>PCR        |
| 3`-A1          | AGCCACGCTAAGCTACAAGG                 |                                |
| 5`-D1          | GGTGTCTGTACGTTGGTTTGC                |                                |
| 3`-D1          | AGCTTTCTCTACCTATCCCAGC               |                                |
| 4AF            | GTCAAGATCTCCAGCCGAGAC                | Transgenic plant<br>sequencing |
| 4AR            | GGTACTTGCCGCTGTACCT                  |                                |
| 4BF            | AACTCAACATGGGGCGTCCTC                |                                |
| 4BR            | ACGTCTGTATGTGGAGAAGATGATG            |                                |
| 4DF            | TTCGGGTCCGATTCTATTGTG                |                                |
| 4DR            | GCAGGTACTTGCCGTTGTACC                |                                |
| Target1        | GCCCCTACATCTTCCCCAAAGG               | Crispr Cas9 target             |
| Target2        | GAAGCGGTTGACGTCCCTGGCGG              |                                |
